# Supplementary material
Source: Springer Nature journal article supplement (http://www.springermedizin.de/resource/supplementary/12990_2010_286_MOESM5_ESM.pdf/9612956)
Supplement: MOESM5 [file 9612956]

Intact  
Cortico-BG-Thalamic loop

Acute  
Pain

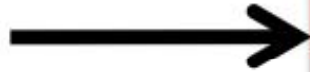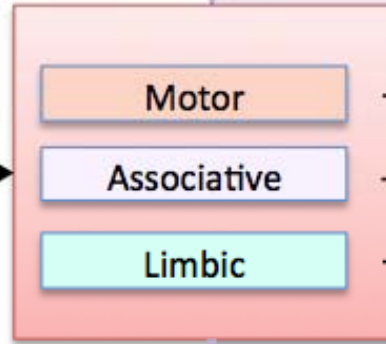

Escape Responses

Memory/Learning

Affective/Aversive Responses

Dysfunctional  
Cortico-BG-Thalamic loop

Chronic  
Pain

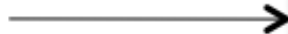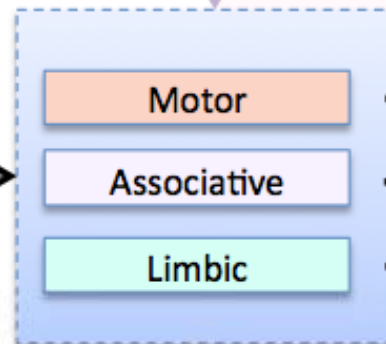

Abnormal Sensorimotor Responses

Cognitive Impairment

Altered Emotional Processing
